# Supplementary material for: Minor change, major difference: divergent functions of highly conserved cis-regulatory elements subsequent to whole genome duplication events
Source: Oxford University Press journal article supplement (doi:10.1242/dev.055996), 2011-01-19
Supplement: dev055996tables1.pdf [file dev055996tables1.pdf]

**Table S1. Primer sequences used for the PCR amplification of *pax2* CNEs**

| CNE ID           | Gene          | Forward primer          | Reverse primer          |
|------------------|---------------|-------------------------|-------------------------|
| CRCNE00000055old | <i>pax2.1</i> | CACTCACAGATTCATCAAAGCC  | AGAGAGTGAGTGACAAAGCAGG  |
| CRCNE00000055new | <i>pax2.1</i> | AATGAAATTGAGACATGGTAG   | AGAGAGTGAGTGACAAAGCAGG  |
| CRCNE00000123old | <i>pax2.2</i> | GAATTAATGGAGACACGGTGGC  | CCATTCTCTCCGCATGAGGG    |
| CRCNE00000123new | <i>pax2.2</i> | GAATTAATGGAGACACGGTGGC  | AAAGGAGAGGAAAAGCACGGG   |
| CRCNE00000056    | <i>pax2.1</i> | CTTTGTCACTCTCTCTCCC     | GATGTGACATAACAACCACGCC  |
| CRCNE00000125    | <i>pax2.2</i> | GCATGACAGGCAGATCCC      | CCTTGATTAGCAGCAGCCTTC   |
| CRCNE00000059    | <i>pax2.1</i> | CTCCCTGTGCTAATCCCTCATC  | CAACCCAGCTCAGGGATGAAG   |
| CRCNE00000127    | <i>pax2.2</i> | AGGACAGAAAACCTAGCCTCAG  | GCAGGCAATGATTAATGTCCCTC |
| CRCNE00000060old | <i>pax2.1</i> | CACAAGTGGTGAGTCTGAGC    | GTGATTTGTTGCGGCGATGC    |
| CRCNE00000060new | <i>pax2.1</i> | GAAGGCAATCTGTTCAATTAAG  | GTGATTTGTTGCGGCGATGC    |
| CRCNE00000128    | <i>pax2.2</i> | CTTGCTCAATCTAGCTTGCG    | TGCTCACTGATTTGTACCAC    |
| CRCNE00000063-4  | <i>pax2.1</i> | CCTACAATCCATCTTGTGGAG   | CCGTTTGGAGCCTGTTCCC     |
| CRCNE00000133    | <i>pax2.2</i> | CCATCCTCAACTCAGATAGTCC  | CGTTTGGAGCTTGTACTCCCAG  |
| CRCNE00000065    | <i>pax2.1</i> | GCCTACAAACAGAGCAGGACC   | GGTGGATCACTCAACCGTGAC   |
| CRCNE00000134    | <i>pax2.2</i> | TAATATCTAGCCGATGCCTG    | GGAACGGCTCGCTTGTGC      |
| CRCNE00000066    | <i>pax2.1</i> | GTTCTGCCTCTGCATATTC     | TACCTGCAACACTAAAAGATCC  |
| CRCNE00000136    | <i>pax2.2</i> | AGTGAAGTGAATAAGCCACAAC  | TTTGCTTCTGTTCTGTGACC    |
| CRCNE00000068    | <i>pax2.1</i> | CTAAGGTGCCCCTGTGAGG     | TCGCTTTATGCCAGACCTTC    |
| CRCNE00000140    | <i>pax2.2</i> | CTTCCGGTCCACGACCTCC     | CTAATGGCTATCTTGAAGTGC   |
| CRCNE00000071    | <i>pax2.1</i> | CATCCTGCCCTCAATCTGG     | CTCAGCCAAATGGCAGGCTTC   |
| CRCNE00000145-7  | <i>pax2.2</i> | GGGTAGGTTATTCAGTGAGCATC | CTCATAAATCTCTCGACGCCG   |
| CRCNE00000078    | <i>pax2.1</i> | GTGCATGACTGTCCTCTC      | GCATGAGACACTGTGGAGG     |
| CRCNE00000151    | <i>pax2.2</i> | ACGCCTCAGAGGCAGTGG      | CAAACGGAGCGACAGTGGGAC   |
| CRCNE00000080    | <i>pax2.1</i> | GGGGAAGATCAATGGAAAACAC  | CTTGGGTCGCTTCAACG       |
| CRCNE00000154    | <i>pax2.2</i> | CGAGGATCAATGGAAAACAGTTG | GCTGCATGACTGAACCTCC     |
| CRCNE00000081    | <i>pax2.1</i> | GTAGTTCTGTGACACAGGACG   | GAGGGAGCTTCTGGTACAATATG |
| CRCNE00000155    | <i>pax2.2</i> | ACAGAGGGGAGAGGTGGG      | TCTCACGCTCTGCTCC        |
| CRCNE00000082    | <i>pax2.1</i> | CCCCAAAGGCTCATCTTTCCC   | CTCGCATAGAGATGGATGACTTG |
| CRCNE00000156    | <i>pax2.2</i> | CTCAGACCTCCTCATTTGGAC   | CCCCTTTTGCTTATATGGATGAC |
| CRCNE00000089    | <i>pax2.1</i> | CGCTCGTCCACACTGAATG     | GTAGCACAAAGAAACTGGG     |
| CRCNE00000164    | <i>pax2.2</i> | CTAATGCTGCGGCACAGGC     | GCTGTTGTCTTTGCTACTCAGG  |
| CRCNE00000090    | <i>pax2.1</i> | GCGAGTTGGGTTATCCTCTG    | CAACAGTGGATGAGGACTTAGC  |
| CRCNE00000165    | <i>pax2.2</i> | GGTCGGGCTCATCTCTG       | CCTCTGCTGCTGATTC        |
| CRCNE00000091-2  | <i>pax2.1</i> | CTTGCTCAAAGCCTGTAATCC   | CCTCCGCTCTTTGTGATTCG    |
| CRCNE00000166-7  | <i>pax2.2</i> | TACATACCACAGCCCACTTGC   | ACCTTCTCGATGCTCTTTGTG   |
| CRCNE00000095    | <i>pax2.1</i> | TTCTGCCATAAGCAAACCTG    | GGGTAACAGAGGACGCC       |
| CRCNE00000171    | <i>pax2.2</i> | CAGCGATAAGCCTATCAGGG    | CCAATCTCTGCCAATGAGCG    |
| CRCNE00000099    | <i>pax2.1</i> | GAACAGATGAGGCAACGAGG    | GTTTGCCAAAGAGGGGCTAC    |
| CRCNE00000174    | <i>pax2.2</i> | GCACCAGTCACTCCCAAC      | CGAGCTACTTTGCTCTTTGC    |
| CRCNE00000100    | <i>pax2.1</i> | GAGCGTGGTGAAGTTAGTCTG   | CATGCCTTCGCTATGACAGGG   |
| CRCNE00000175    | <i>pax2.2</i> | TACCAGGGGAGTGCAGTGG     | CATGGCTTCTCTATGACAGG    |
| CRCNE00000735    | <i>pax8</i>   | AGCGGCAGAGAGGGTAAAAG    | AGCTCAGCTGAAAGCCACAG    |

CONDOR database (<http://condor.nimr.mrc.ac.uk/>). Identification numbers of CNEs are given in the first column, followed by the associated Fugu *pax2* co-orthologue. Where CNEs were re-assayed, sequences used in the original and repeat assays are referred to as 'old' and 'new', respectively. Additional primer sequences are given for the *pax8* element tested using the Tol-2 assay.
