# Supplementary material for: Minor change, major difference: divergent functions of highly conserved cis-regulatory elements subsequent to whole genome duplication events
Source: Oxford University Press journal article supplement (doi:10.1242/dev.055996), 2011-01-19
Supplement: dev055996tables2.pdf [file dev055996tables2.pdf]

**Table S2. Summary of the results from analysing *pax2/8* CNEs using either the co-injection assay or Tol2 cloning**

| CNE ID         | Gene          | Expression                                                         |                                                                              |
|----------------|---------------|--------------------------------------------------------------------|------------------------------------------------------------------------------|
|                |               | Co-injection                                                       | Tol2                                                                         |
| CRCNE0000063-4 | <i>pax2.1</i> | CNS , eye, cardiovascular, blood, muscle, pronephric region        | CNS, eye, ear, cardiovascular, blood, muscle, pronephric region              |
| CRCNE00000133  | <i>pax2.2</i> | Hindbrain, spinal cord, telencephalon, eye, cardiovascular, muscle | Hindbrain, spinal cord, telencephalon, eye, cardiovascular, muscle           |
| CRCNE00000735  | <i>pax8</i>   | CNS                                                                | CNS, eye, ear                                                                |
| CRCNE00000100  | <i>pax2.1</i> | No expression out of 235 screened                                  | No expression on day 2, 10/292 with expression in heart and/or skin on day 3 |
| CRCNE00000175  | <i>pax2.2</i> | No expression out of 244 screened                                  | No expression out of 525 screened                                            |

CONDOR identifiers are given in the first column followed by the gene name and description of expression. For GFP-positive elements, we selected CNEs with shared sequence homology to both *pax2* co-orthologues and *pax8* (the first three elements listed here). As illustrated in Fig. S5, expression is highly similar. None of the expression domains described for the co-injection assay differed from those observed in the Tol2 results. The other two elements showed no evidence of enhancer activity using the co-injection assay. This was corroborated by the Tol2 system, with only a low level of expression on day 3 in the case of element CRCNE00000175. This may be due to the higher level of transient expression (both specific and ectopic) usually observed with the Tol2 method.
